# Supplementary material for: Multiple environmental stressors confine the ecological niche of the rotifer Cephalodella acidophila
Source: PubMed Central journal article supplement (PMC3659023; doi:10.1111/fwb.12104), 2013-05

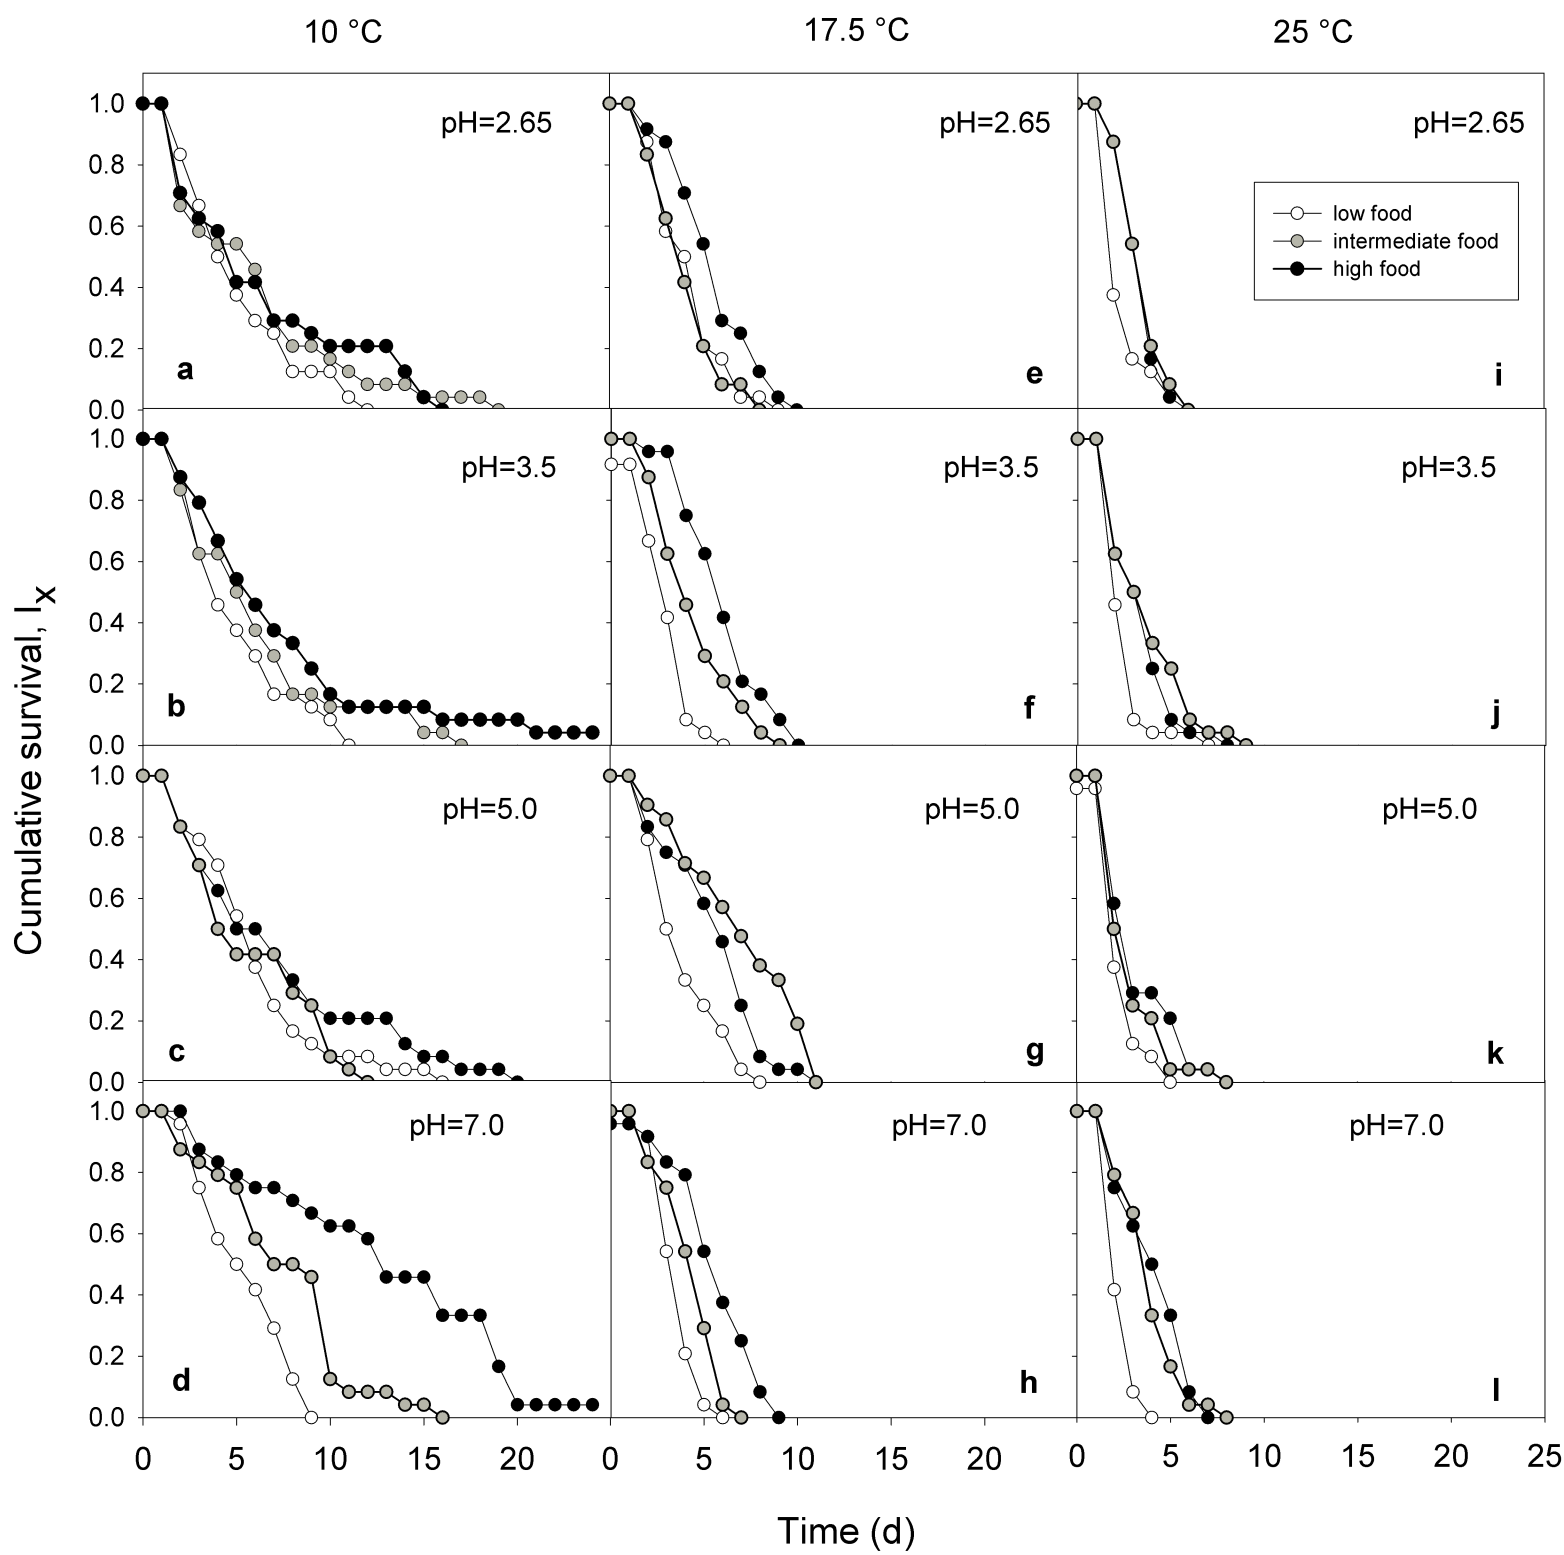

Supplement: fwb0058-1008-SD1.pdf [file fwb0058-1008-SD1.pdf]
